# Supplementary material for: Magnetic mesoporous silica hybrid nanoparticles for highly selective boron adsorption
Source: Royal Society of Chemistry journal article supplement (doi:10.1039/c3ta12553j), 2013-01-01
Supplement: c3ta12553j.pdf [file c3ta12553j.pdf]

## **Electronic Supplementary Information(ESI)**

### **Magnetic Mesoporous Silica Hybrid Nanoparticles For Highly Selective Boron Adsorption**

**Madhappan Santha Moorthy, Deok-Jin Seo, Hyun-Jin Song, Sung-Soo Park,  
Chang-Sik Ha\***

*Department of Polymer Science and Engineering, Pusan National University,  
Busan-609-735, Korea.*

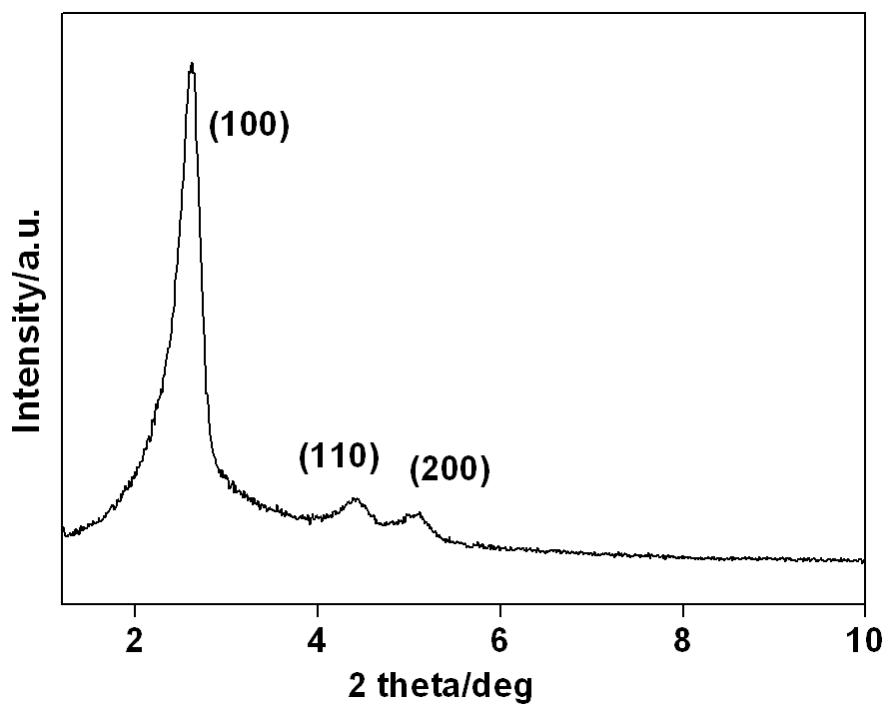

**Fig. S1** Low-angle XRD pattern of MSH@NH-(OH)<sub>2</sub> adsorbent.

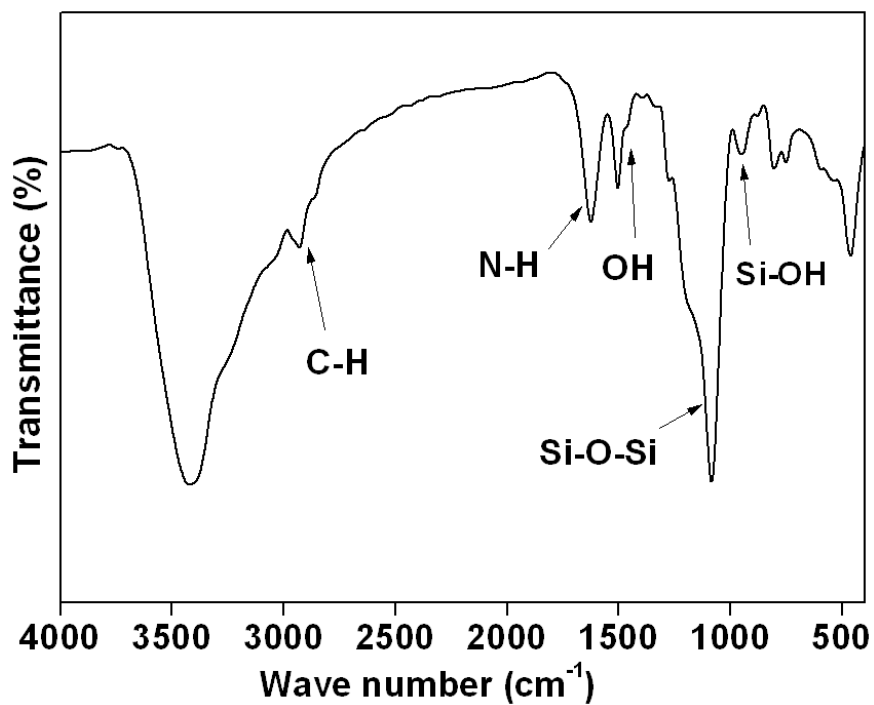

**Fig. S2** FTIR spectrum of MSH@NH-(OH)<sub>2</sub> adsorbent.

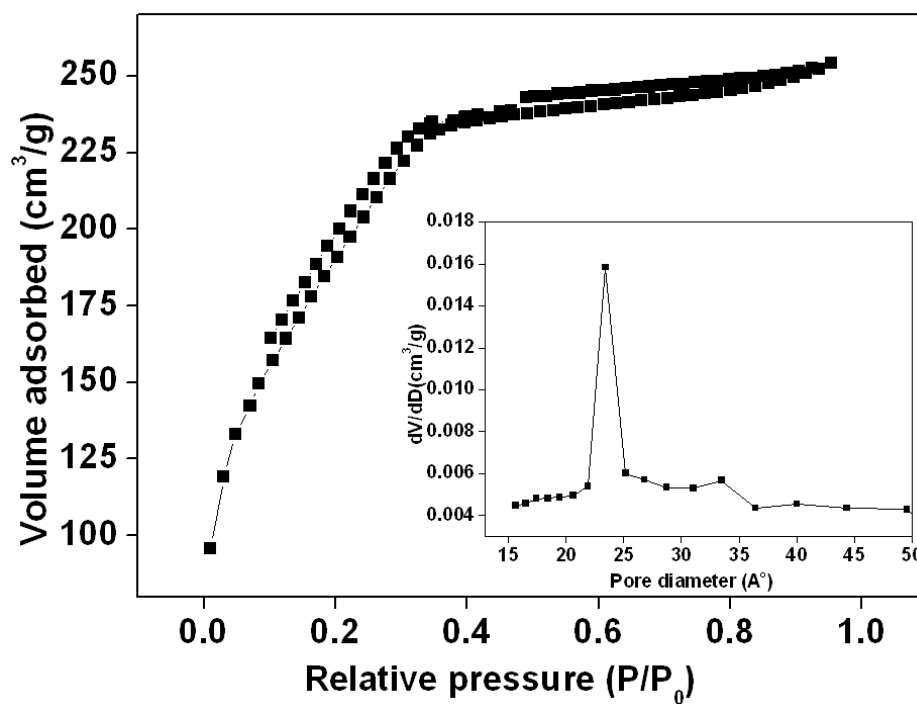

**Fig. S3** N<sub>2</sub> adsorption-desorption and mesopore size distribution (inset) of MSH@NH-(OH)<sub>2</sub>.

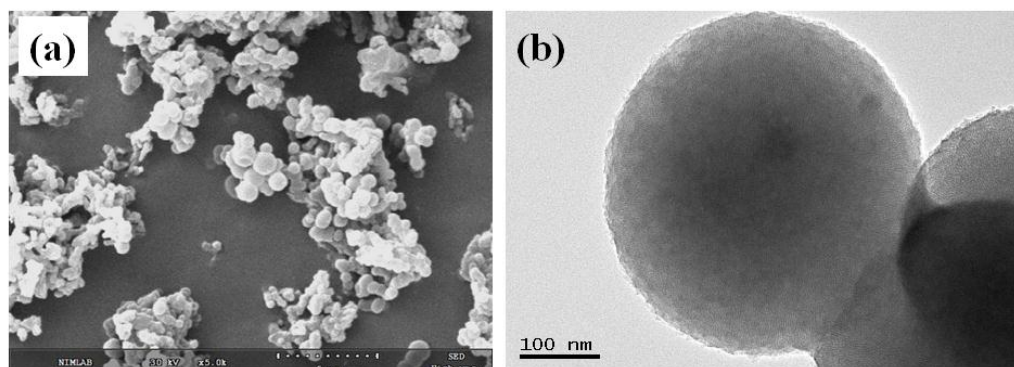

**Fig. S4** (a) SEM and (B) TEM images of the MSH@NH-(OH)<sub>2</sub>.

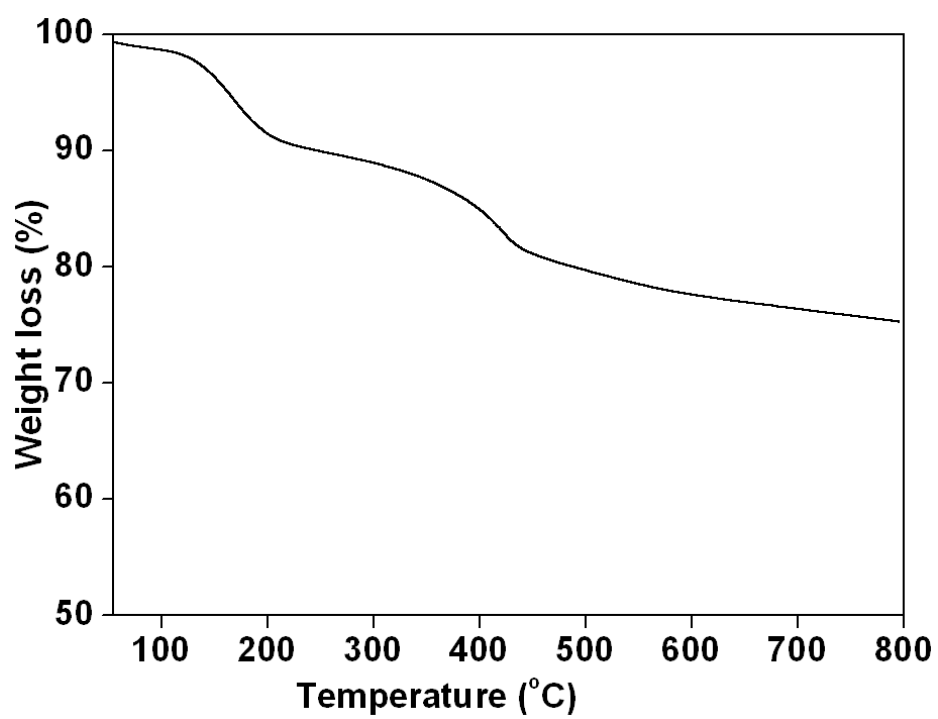

**Fig. S5** TGA curve of MSH@NH-(OH)<sub>2</sub>.

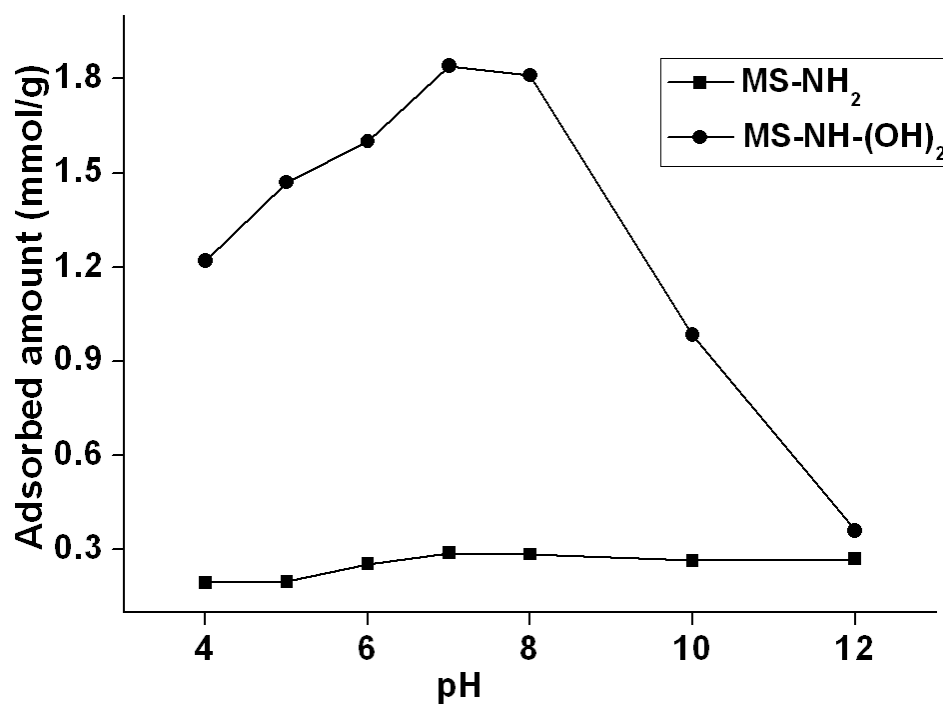

**Fig. S6** Boron adsorption efficiency of MSH@NH<sub>2</sub> (■) and MSH@NH-(OH)<sub>2</sub> (●) as a function of the pH.

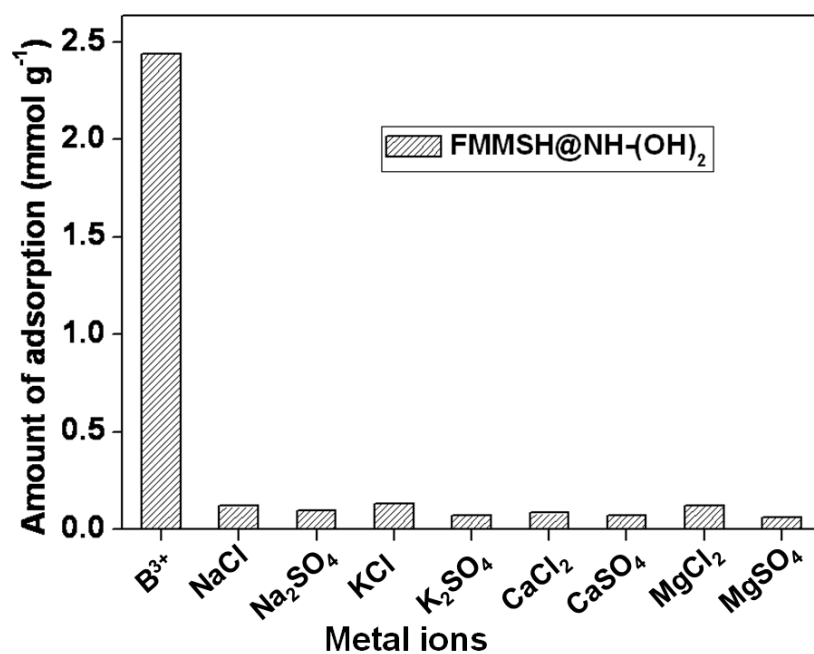

**Fig. S7** Boron adsorption efficiency on FMMSH@NH-(OH)<sub>2</sub> adsorbent in the presence of sulphates and chlorides of Na, K, Ca and Mg ions.

**Table S1** Textural properties of the MSH@NH-(OH)<sub>2</sub>.

| Sample                   | d <sub>100</sub> (nm) <sup>a</sup> | a <sub>0</sub> (nm) <sup>b</sup> | Wall thickness (nm) <sup>c</sup> | SBET (m <sup>2</sup> /g) | Pore volume (cm <sup>3</sup> /g) <sup>d</sup> | Pore diameter (nm) <sup>e</sup> |
|--------------------------|------------------------------------|----------------------------------|----------------------------------|--------------------------|-----------------------------------------------|---------------------------------|
| MSH@NH-(OH) <sub>2</sub> | 3.4                                | 3.92                             | 1.62                             | 567                      | 1.6                                           | 2.3                             |

<sup>a</sup> Calculated from XRD analysis

<sup>b</sup>  $a_0 = 2d_{100}/\sqrt{3}$

<sup>c</sup> Wall thickness =  $a_0 - \text{pore diameter}$

<sup>d</sup> Calculated from adsorption branch of nitrogen isotherm using BJH model

<sup>e</sup> Calculated from volume adsorbed of P/P0 at 0.5

**Table S2** Boron adsorption capacity of various adsorbents as reported in the literature<sup>a</sup>

| Adsorbent                                 | $Q_m/\text{mmol g}^{-1}$ | Reference  |
|-------------------------------------------|--------------------------|------------|
| FMMSH@NH-(OH) <sub>2</sub>                | 2.37                     | This study |
| glycidol modified terpolymer              | 0.83                     | [22a]      |
| glucose modified mesoporous silicas       | 0.38                     | [23b]      |
| D-glucamine modified silicas              | 1.55                     | [23c]      |
| Polymer gel                               | 2.1                      | [43a]      |
| Terpolymer beads                          | 1.77                     | [43b]      |
| Sacride modified mesoporous silicas       | 1.85                     | [43c]      |
| Cotton cellulose                          | 0.69                     | [43d]      |
| Hydroxyl functionalized polymers          | 3.21                     | [S1]       |
| D-glucamine modified polymer microspheres | 0.03                     | [S2]       |
| Calcium alginate gel beads                | 1.40                     | [S3]       |
| Resin XSC-700                             | 0.12                     | [S4]       |
| Curcumin containing activated carbon      | 0.08                     | [S5]       |
| Amine modified tannin gel                 | 0.12                     | [S6]       |
| Salicylic HCHO polymer resin              | 1.36                     | [S7]       |
| Modifiedvermiculite                       | 0.15                     | [S8]       |
| Modified clays                            | 0.03                     | [S9]       |

<sup>a</sup> In this table, we list only several representative adsorbents employed for boron adsorbent.

## Reference

- [S1] M. Gazi, G. Galli, N. Bicak, *Sep. Purif. Technol.* 2008, **62**, 484.
- [S2] J. Wolska, M. Bryjak, N. Kabay, *J. Environ. GeoChem. Health*, 2010, **32**, 349.
- [S3] M. Ruiz, C. Tobalina, H. Demey-Cedeno, J.A. Barron-Zambrano, A.M. Sastre, *React. Funct. Polym.* 2013, **73**, 653.
- [S4] X. Xiang, C. Bai-Zhen, S. Xi-Chang, C. Ya, *J. Cent. South. Univ.* 2012, **19**, 2768.
- [S5] A.A. Halim, N.A. Roslan, N. Awang, M.H. Mustapa, M.F. Arshad, *Emp. Sci. Technol.* 2011, **39**, 308.
- [S6] S. Morisada, T. Rin, T. Ogata, Y.-H. Kim, Y. Nakano, *Water Research*, 2011, **45**, 4028.
- [S7] S. Yu, H. Xue, Y. Fan, R. Shi, *Chem. Eng. J.* 2013, **219**, 327.
- [S8] M. Kehal, L. Reinert, L. Duclaux, *Appl. Clay Sci.* 2010, **48**, 561.
- [S9] S. Karahan, M. Yurdakoc, Y. Seki, K. Yurdakoc, *Colloid and Interface Sci.* 2006, **293**, 36.
